# Supplementary material for: Controllable Phase Transformation and Enhanced Photocatalytic Performance of Nano-TiO2 by Using Oxalic Acid
Source: MDPI journal article supplement (doi:10.3390/nano12173019), 2022-08-31
Supplement: s1 [file s1]

# Controllable Phase Transformation and Enhanced Photocatalytic Performance of Nano-TiO<sub>2</sub> by Using Oxalic Acid

Jiaqi Chen <sup>1</sup>, Jian Gao <sup>1</sup>, Xiaoyang Liu <sup>1</sup>, Pan Wang <sup>1</sup>, Xue Yu <sup>1</sup>, Feng Zhao <sup>2</sup>, Yan Sun <sup>1</sup>, Wei Feng <sup>1,\*</sup> and Qingyuan Wang <sup>1,\*</sup>

<sup>1</sup> School of Mechanical Engineering, Chengdu University, Chengdu 610000, China

<sup>2</sup> Institute for Advanced Materials Deformation and Damage from Multi-Scale, Chengdu University, Chengdu, 610106, China

\* Correspondence: fengwei233@126.com (W.F.); wangqy@cdu.edu.cn (Q.W.)

**Table S1.** The dosages of solution A and B with different molar ratios of OA to TBOT.

| Solution<br>Ratio | Solution A (mL) | Solution B (mL) |                       |
|-------------------|-----------------|-----------------|-----------------------|
|                   |                 | OA (mL)         | H <sub>2</sub> O (mL) |
| 0: 10             | 20              | 0               | 60                    |
| 5: 10             | 20              | 10              | 50                    |
| 15: 10            | 20              | 30              | 30                    |
| 25: 10            | 20              | 50              | 10                    |

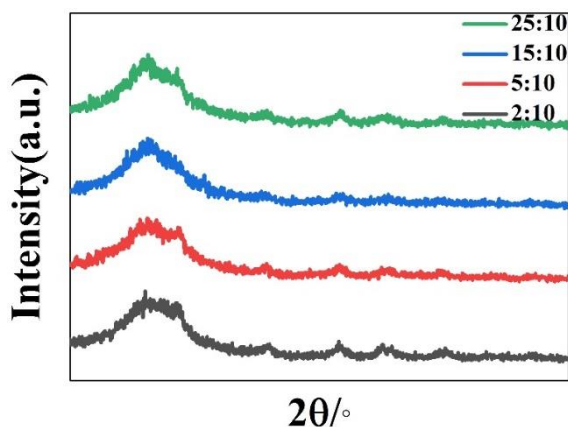

**Figure S1.** XRD patterns of precursors R0, R5, R15 and R25.

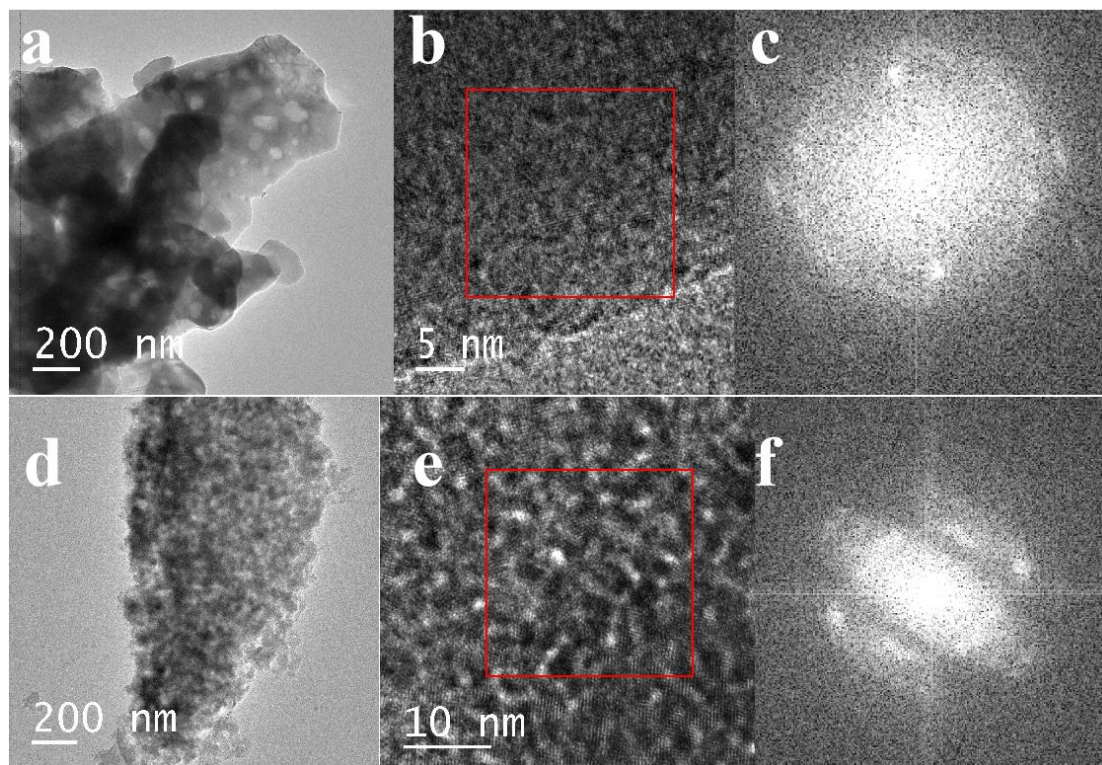

**Figure S2.** The (a, d)TEM, (b, e) HR-TEM and (c, f) corresponding Fast Fourier transform (FFT) images of the precursor R0 and R25.

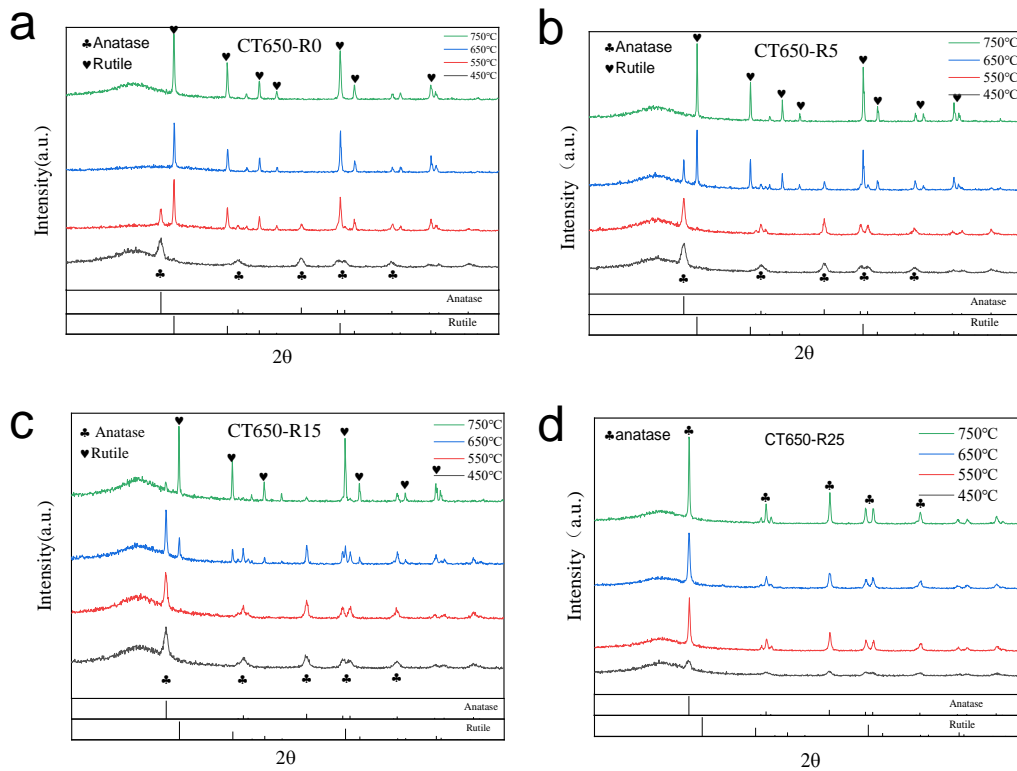

**Figure S3.** XRD patterns of  $\text{TiO}_2$  obtained from precursors (a) R0, (b) R5, (c) R15 and (d) R25 after calcination at 450°C, 550°C, 650°C and 750°C.

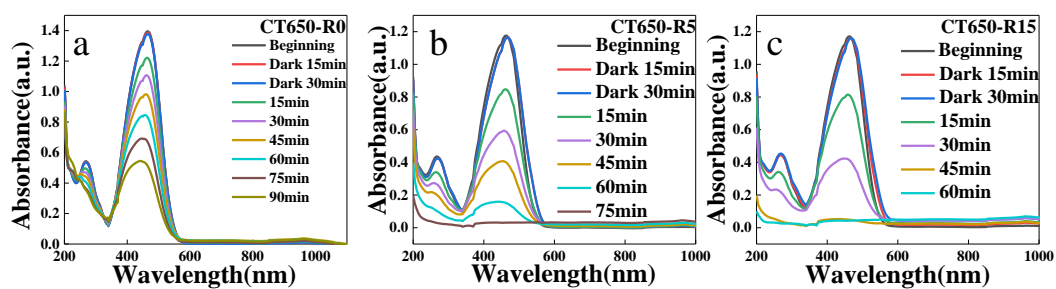

Figure S4. The absorbance of MO degraded by the CT650-R0, CT650-R5 and CT650-R15 samples.

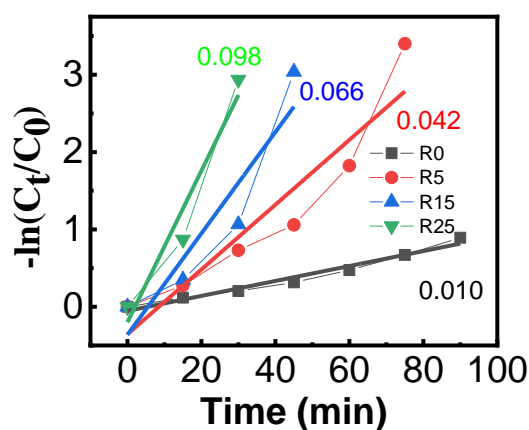

Figure S5. The  $-\ln(C_t/C_0)$  of MO versus time degraded by the CT650-R0, CT650-R5, CT650-R15 and CT650-R25 samples.

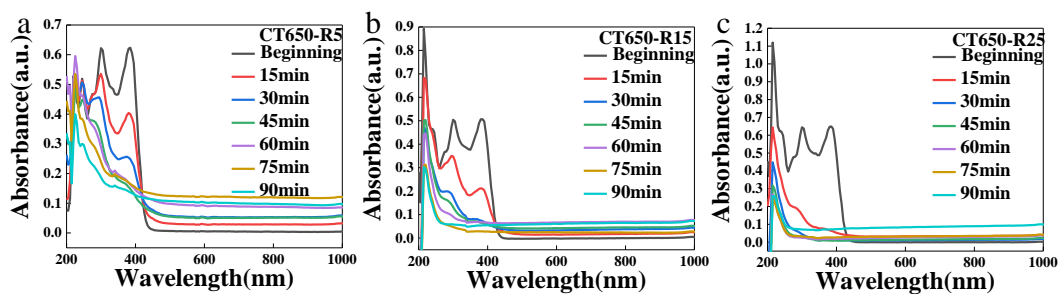

Figure S6. The absorbance of TC degraded by the CT650-R5, CT650-R15 and CT650-R25 samples.

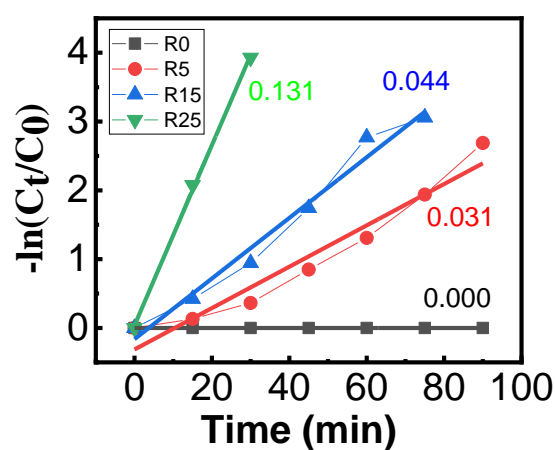

**Figure S7.** The  $-\ln(C_t/C_0)$  of TC versus time degraded by the CT650-R0, CT650-R5, CT650-R15 and CT650-R25 samples.

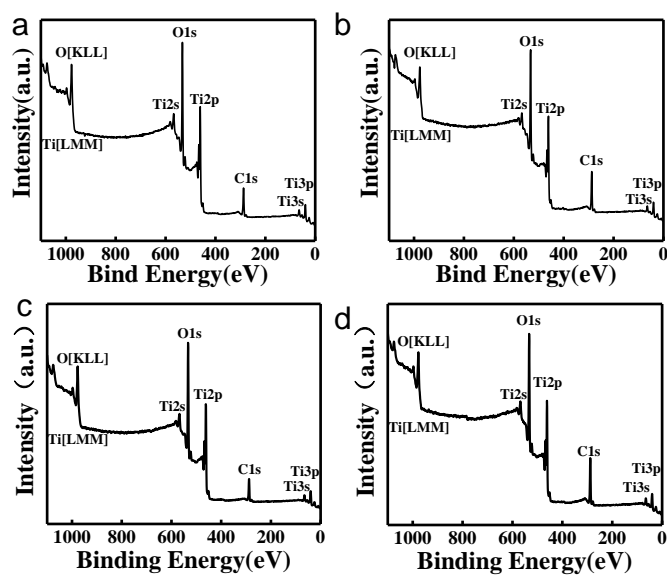

**Figure S8.** XPS total spectra of CT450-R25 (a), CT550-R25 (b), CT650-R25 (c) and CT750-R25 (d).

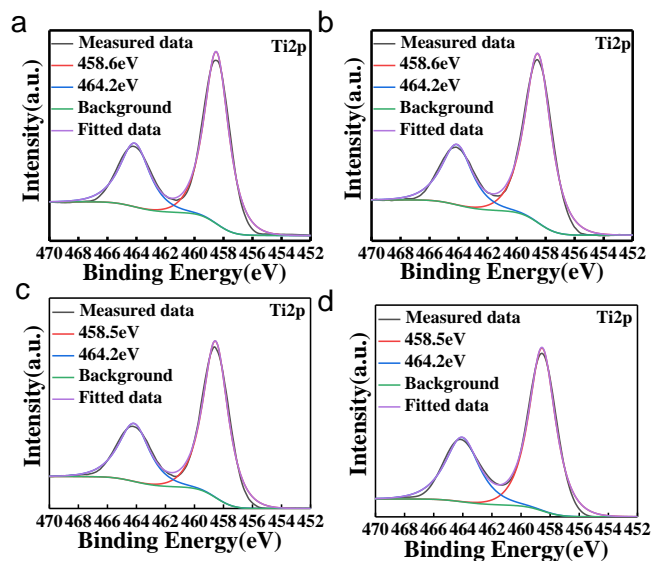

**Figure S9.** HR XPS spectra of Ti 2p of CT450-R25 (a), CT550-R25 (b), CT650-R25 (c) and CT750-R25 (d).

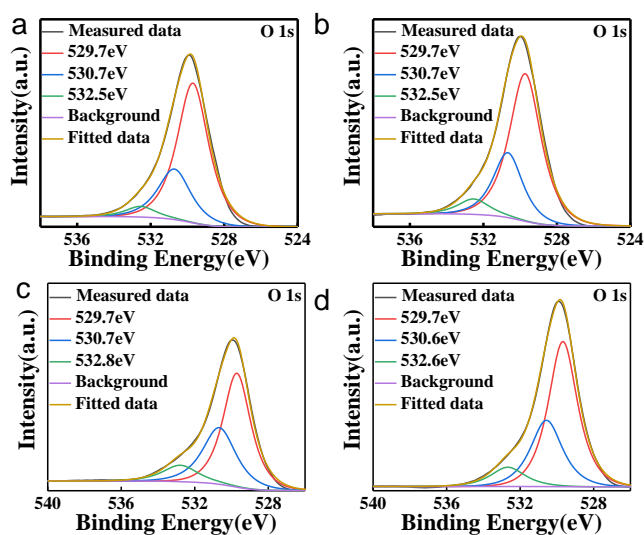

**Figure S10.** HR XPS spectra of O 1s of CT450-R25 (a), CT550-R25 (b), CT650-R25 (c) and CT750-R25 (d).

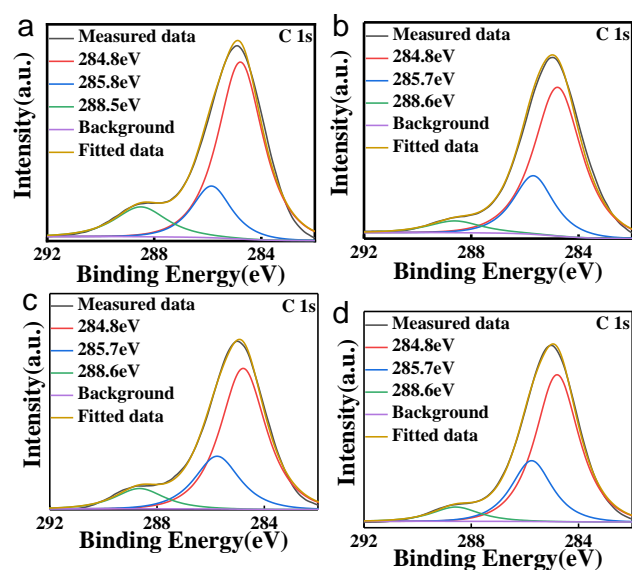

**Figure S11.** HR XPS spectra of C 1s of CT450-R25 (a), CT550-R25 (b), CT650-R25 (c) and CT750-R25 (d).

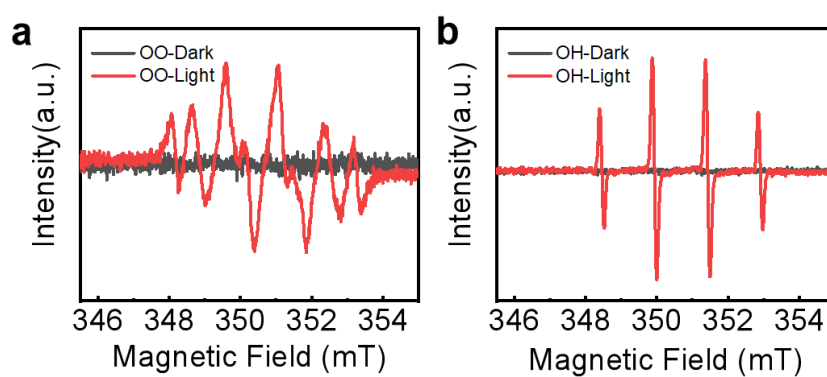

**Figure S12.** ESR spin signals of (a) superoxide ( $\bullet\text{O}_2^-$ ) and (b) hydroxyl ( $\bullet\text{OH}$ ) radicals trapped by DMPO in CT650-R25 dispersion under the Xe lamp.

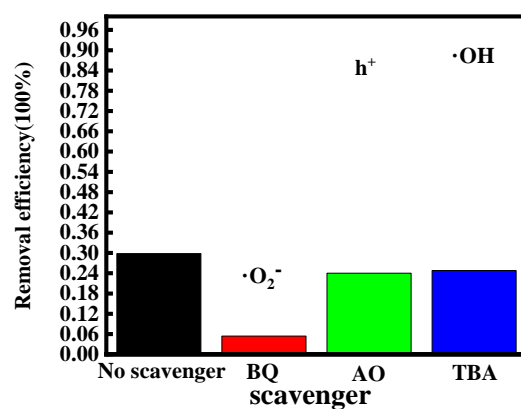

**Figure S13.** The degradation rate of CT650-R0 in the presence of different scavengers.
